# Supplementary material for: Inhibition of mTORC1 Enhances the Translation of Chikungunya Proteins via the Activation of the MnK/eIF4E Pathway
Source: PubMed Central journal article supplement (PMC4552638; doi:10.1371/journal.ppat.1005091), 2015-08-28

A.

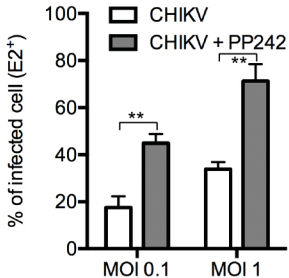

B.

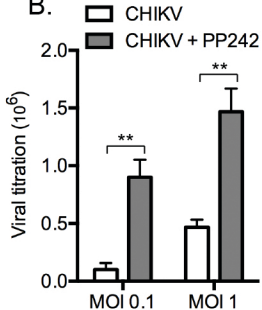

Supplement: ppat.1005091.s001.pdf [file ppat.1005091.s001.pdf]
