# Supplementary material for: Inhibition of mTORC1 Enhances the Translation of Chikungunya Proteins via the Activation of the MnK/eIF4E Pathway
Source: PubMed Central journal article supplement (PMC4552638; doi:10.1371/journal.ppat.1005091), 2015-08-28

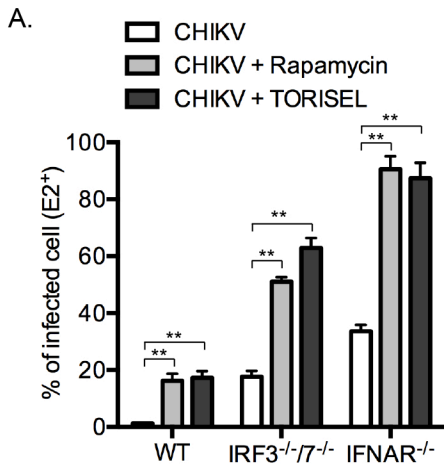

**B.**

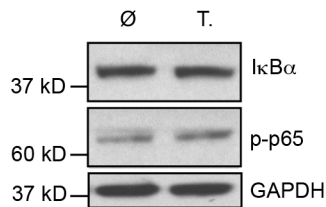

**C.**

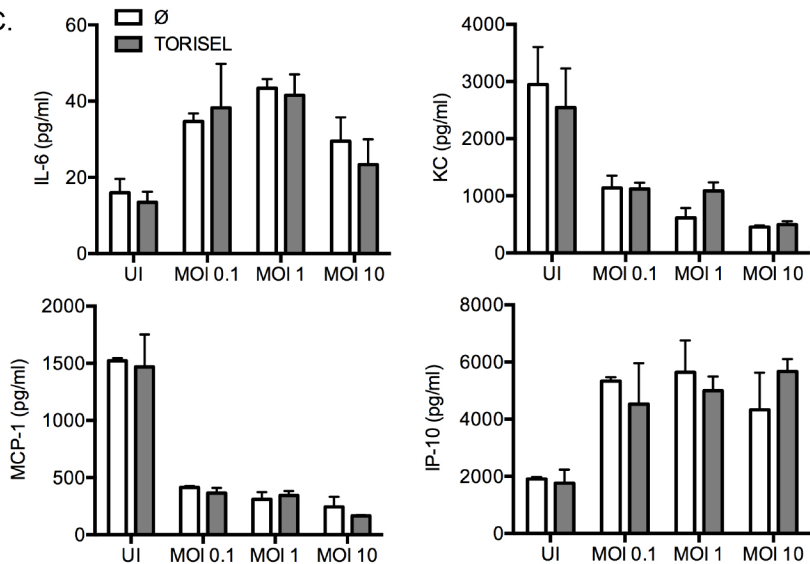

**D.**

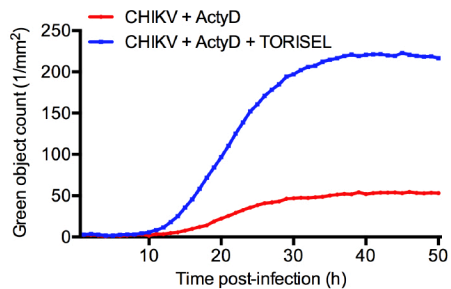

**E.**

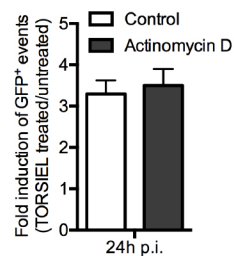

Supplement: ppat.1005091.s004.pdf [file ppat.1005091.s004.pdf]
